# Supplementary figures and images for: Astaxanthin Prevents Alcoholic Fatty Liver Disease by Modulating Mouse Gut Microbiota
Source: MDPI journal article supplement (doi:10.3390/nu10091298), 2018-09-13

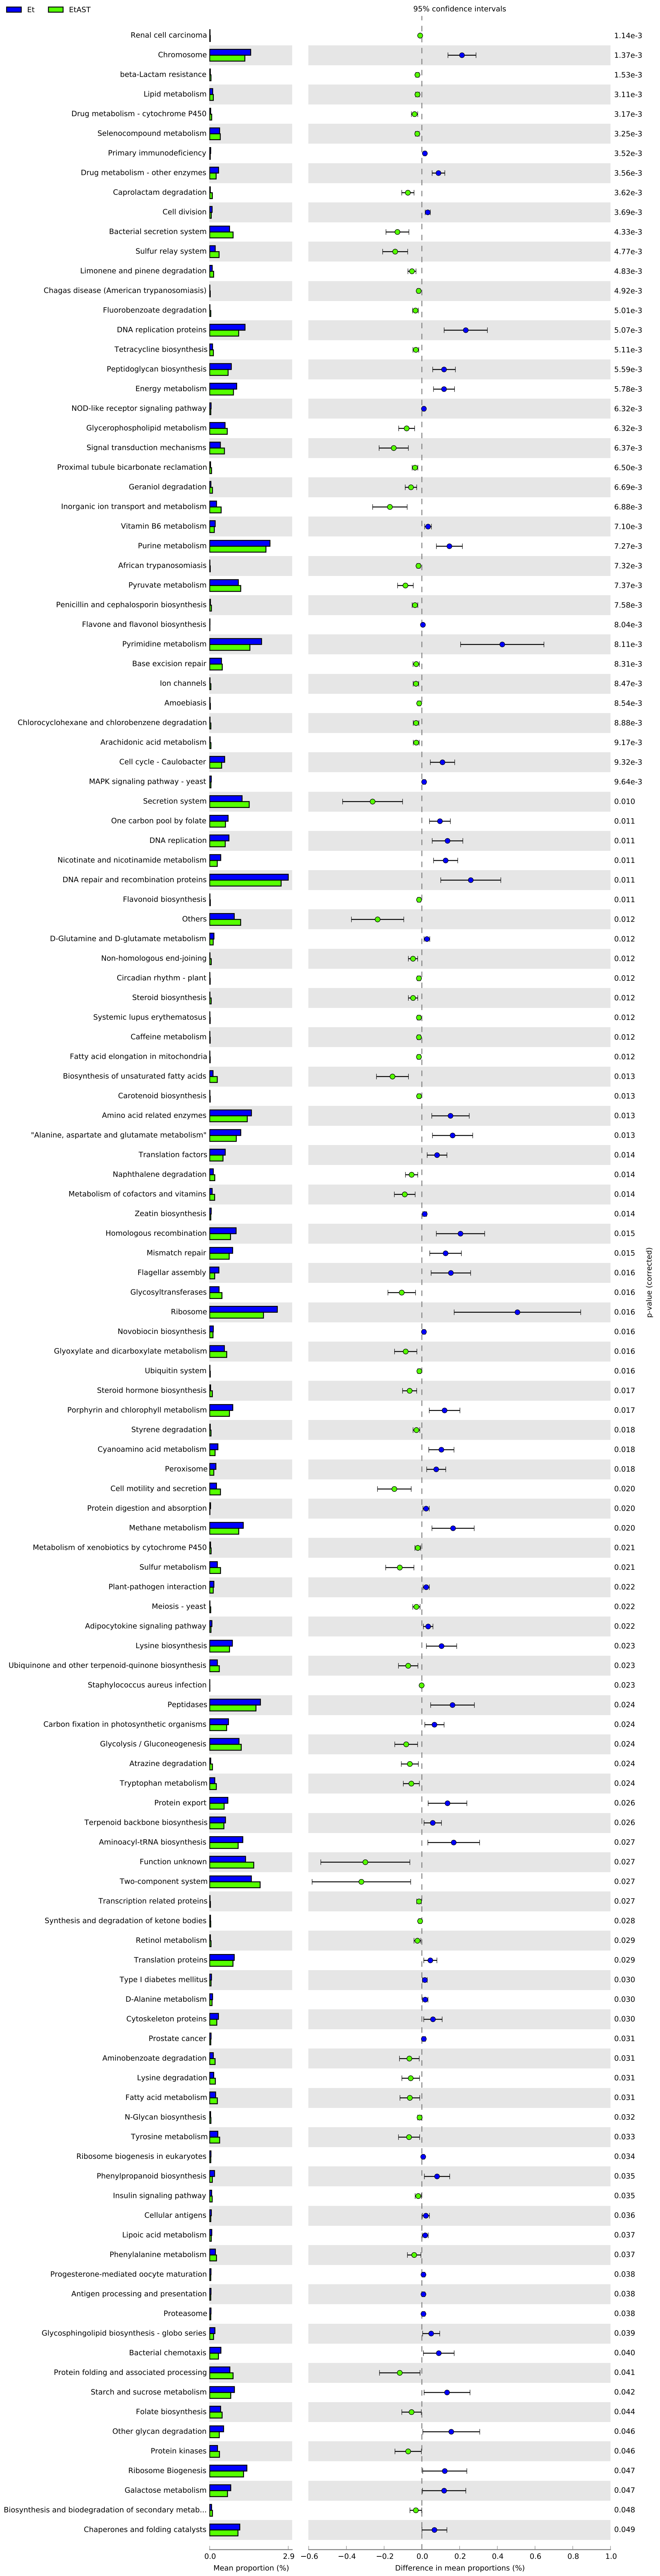

Supplement: s1 [file s1]
